# Supplementary material for: Altered Dairy Protein Intake Does Not Alter Circulatory Branched Chain Amino Acids in Healthy Adults: A Randomized Controlled Trial
Source: PubMed Central journal article supplement (PMC6213722; doi:10.3390/nu10101510), 2018-10-15
Supplement: nutrients-10-01510-s001.pdf [file nutrients-10-01510-s001.pdf]

**Table S1.** Plasma concentrations of amino acids by dairy intake groups throughout the intervention period.

|                                    | <i>Reduced dairy intake</i> |                          | <i>Maintained dairy intake</i> |                          | <i>Increased dairy intake</i> |                          | <i>p-value<sup>a</sup></i> |
|------------------------------------|-----------------------------|--------------------------|--------------------------------|--------------------------|-------------------------------|--------------------------|----------------------------|
|                                    | (n=36)                      |                          | (n=33)                         |                          | (n=33)                        |                          |                            |
|                                    | <b>Baseline</b>             | <b>Post intervention</b> | <b>Baseline</b>                | <b>Post intervention</b> | <b>Baseline</b>               | <b>Post intervention</b> |                            |
| <i>Branched-chain amino acids</i>  |                             |                          |                                |                          |                               |                          |                            |
| <b>Valine</b>                      | 163.45 ± 5.39               | 166.14 ± 5.99            | 168.9 ± 5.63                   | 171.61 ± 6.26            | 172.84 ± 5.63                 | 172.32 ± 6.25            | 0.82                       |
| <b>Leucine</b>                     | 83.97 ± 3.49                | 86.74 ± 3.72             | 90.62 ± 3.64                   | 93.42 ± 3.89             | 94.63 ± 3.64                  | 92.61 ± 3.89             | 0.32                       |
| <b>Isoleucine</b>                  | 40.16 ± 1.91                | 40.05 ± 1.99             | 42.69 ± 2.00                   | 43.38 ± 2.08             | 42.32 ± 2.00                  | 41.99 ± 2.08             | 0.84                       |
| <i>Other essential amino acids</i> |                             |                          |                                |                          |                               |                          |                            |
| <b>Phenylalanine</b>               | 36.41 ± 1.05                | 37.48 ± 1.04             | 38.49 ± 1.10                   | 39.33 ± 1.08             | 38.81 ± 1.10                  | 38.23 ± 1.08             | 0.52                       |
| <b>Methionine</b>                  | 19.01 ± 1.13                | 19.79 ± 1.29             | 19.97 ± 1.18                   | 20.53 ± 1.34             | 20.1 ± 1.18                   | 19.99 ± 1.35             | 0.64                       |
| <b>Lysine</b>                      | 97.86 ± 3.85                | 101.18 ± 4.29            | 101.84 ± 4.10                  | 98.1 ± 4.56              | 103.75 ± 3.96                 | 104.81 ± 4.42            | 0.44                       |
| <b>Histidine</b>                   | 23.75 ± 0.85                | 25.37 ± 1.24             | 25.26 ± 0.89                   | 25.35 ± 1.30             | 26.29 ± 0.89                  | 26.05 ± 1.30             | 0.44                       |
| <b>Threonine</b>                   | 21.15 ± 0.92                | 21.2 ± 0.92              | 21.45 ± 0.96                   | 20.91 ± 1.00             | 23.21 ± 0.96                  | 23.11 ± 0.97             | 0.80                       |
| <i>Non-essential amino acids</i>   |                             |                          |                                |                          |                               |                          |                            |
| <b>Glycine</b>                     | 186.79 ± 12.57              | 195.69 ± 12.41           | 192.48 ± 13.13                 | 188.43 ± 12.96           | 203.89 ± 13.13                | 187.10 ± 12.96           | 0.36                       |
| <b>Asparagine</b>                  | 35.84 ± 2.44                | 37.65 ± 2.66             | 39.11 ± 2.55                   | 40.22 ± 2.77             | 38.0 ± 2.55                   | 38.51 ± 2.77             | 0.90                       |
| <b>Alanine</b>                     | 244.53 ± 9.71               | 252.41 ± 10.95           | 258.54 ± 10.15                 | 256.37 ± 11.44           | 257.46 ± 10.15                | 253.69 ± 11.44           | 0.69                       |
| <b>Arginine</b>                    | 16.96 ± 1.72                | 17.5 ± 1.91              | 18.73 ± 1.85                   | 19.33 ± 2.06             | 20.3 ± 1.82                   | 18.22 ± 2.03             | 0.33                       |
| <b>Serine</b>                      | 78.51 ± 4.10                | 82.49 ± 4.09             | 72.58 ± 4.29                   | 70.57 ± 4.27             | 75.14 ± 4.29                  | 73.77 ± 4.27             | 0.16                       |
| <b>Proline</b>                     | 143.03 ± 7.46               | 142.54 ± 7.87            | 152.89 ± 7.79                  | 154.73 ± 8.22            | 165.51 ± 7.79                 | 168.43 ± 8.22            | 0.92                       |
| <b>Tyrosine</b>                    | 43.44 ± 1.97                | 42.52 ± 2.01             | 47.46 ± 2.06                   | 48.29 ± 2.10             | 45.63 ± 2.06                  | 46.41 ± 2.10             | 0.68                       |
| <b>Aspartic acid</b>               | 1.93 ± 0.19                 | 1.86 ± 0.15              | 1.96 ± 0.20                    | 1.79 ± 0.15              | 1.89 ± 0.20                   | 1.98 ± 0.15              | 0.61                       |
| <b>Glutamic acid</b>               | 21.41 ± 1.81                | 22.63 ± 1.97             | 22.47 ± 1.89                   | 23.39 ± 2.06             | 22.2 ± 1.89                   | 24.78 ± 2.06             | 0.72                       |
| <b>Glutamine</b>                   | 393.7 ± 9.93                | 399.3 ± 10.39            | 394.86 ± 10.34                 | 393.9 ± 10.85            | 411.7 ± 10.37                 | 406.54 ± 10.85           | 0.61                       |
| <i>Non-proteogenic amino acids</i> |                             |                          |                                |                          |                               |                          |                            |
| <b>Taurine</b>                     | 54.01 ± 2.60                | 48.84 ± 2.39             | 46.74 ± 2.71                   | 43.37 ± 2.44             | 46.49 ± 2.71                  | 46.04 ± 2.44             | 0.41                       |
| <b>Hydroxyproline</b>              | 6.83 ± 0.71                 | 7.39 ± 0.67              | 6.78 ± 0.74                    | 6.37 ± 0.70              | 6.91 ± 0.74                   | 6.57 ± 0.70              | 0.66                       |
| <b>Ornithine</b>                   | 32.56 ± 1.87                | 34.11 ± 1.78             | 34.80 ± 1.96                   | 31.19 ± 1.86             | 32.94 ± 1.96                  | 34.38 ± 1.86             | 0.06                       |
| <b>Citrulline</b>                  | 80.22 ± 4.08                | 81.44 ± 4.09             | 86.98 ± 4.26                   | 84.76 ± 4.28             | 81.73 ± 4.26                  | 80.76 ± 4.28             | 0.82                       |

Values represent mean ± SEM. <sup>a</sup> Comparisons between dairy intake groups and interactions (time × dietary intervention group) analyzed by two-factor repeated-measures ANOVA. None of the changes were significant ( $p > 0.05$  each, respectively).
